# Supplementary material for: High structural diversity controlled by temperature and induction agent
Source: Royal Society of Chemistry journal article supplement (doi:10.1039/c1ce06456h), 2012-01-01
Supplement: c1ce06456h.pdf [file c1ce06456h.pdf]

# High structural diversity controlled by temperature and induction agent†

Min Chen, Yi Lu, Jian Fan, Gao-Chao Lv, Yue Zhao, Yan Zhang, Wei-Yin Sun\*

*Coordination Chemistry Institute, State Key Laboratory of Coordination Chemistry, School of Chemistry and Chemical Engineering, Nanjing National Laboratory of Microstructures, Nanjing University, Nanjing 210093, China. E-mail: [sunwy@nju.edu.cn](mailto:sunwy@nju.edu.cn); Fax: +86 25 83314502*

**Table S1.** Selective Bond Lengths (Å) and Angles (deg) for Compounds **1** – **5**.<sup>a</sup>

| <b>1</b>           |            |                     |          |
|--------------------|------------|---------------------|----------|
| Zn(1)–O(7)#1       | 1.986(5)   | Zn(1)–O(2)          | 2.035(5) |
| Zn(1)–N(6)#2       | 2.057(5)   | Zn(1)–O(17)         | 2.069(5) |
| Zn(1)–O(18)        | 2.182(5)   | Zn(2)–O(6)          | 1.979(4) |
| Zn(2)–O(4)         | 1.998(5)   | Zn(2)–N(2)#3        | 2.031(6) |
| Zn(2)–O(20)        | 2.160(5)   | Zn(2)–O(19)         | 2.162(5) |
| Zn(3)–O(9)         | 1.982(5)   | Zn(3)–O(16)#1       | 2.031(4) |
| Zn(3)–O(22)        | 2.059(5)   | Zn(3)–N(8)#4        | 2.071(5) |
| Zn(3)–O(21)        | 2.110(5)   | Zn(4)–O(12)         | 1.998(4) |
| Zn(4)–O(14)        | 2.010(5)   | Zn(4)–N(12)#4       | 2.035(5) |
| Zn(4)–O(23)        | 2.141(5)   | Zn(4)–O(24)         | 2.156(5) |
| O(7)#1–Zn(1)–O(2)  | 118.84(19) | O(7)#1–Zn(1)–N(6)#2 | 96.4(2)  |
| O(2)–Zn(1)–N(6)#2  | 144.3(2)   | O(7)#1–Zn(1)–O(17)  | 93.0(2)  |
| O(2)–Zn(1)–O(17)   | 90.0(2)    | N(6)#2–Zn(1)–O(17)  | 93.9(2)  |
| O(7)#1–Zn(1)–O(18) | 92.9(2)    | O(2)–Zn(1)–O(18)    | 87.1(2)  |
| N(6)#2–Zn(1)–O(18) | 85.5(2)    | O(17)–Zn(1)–O(18)   | 174.1(2) |
| O(6)–Zn(2)–O(4)    | 94.3(2)    | O(6)–Zn(2)–N(2)#3   | 120.9(2) |
| O(4)–Zn(2)–N(2)#3  | 144.5(2)   | O(6)–Zn(2)–O(20)    | 90.7(2)  |

|                      |          |                     |          |
|----------------------|----------|---------------------|----------|
| O(4)–Zn(2)–O(20)     | 86.5(2)  | N(2)#3–Zn(2)–O(20)  | 88.5(2)  |
| O(6)–Zn(2)–O(19)     | 97.2(2)  | O(4)–Zn(2)–O(19)    | 91.0(2)  |
| N(2)#3–Zn(2)–O(19)   | 89.1(2)  | O(20)–Zn(2)–O(19)   | 171.9(2) |
| O(9)–Zn(3)–O(16)#1   | 118.4(2) | O(9)–Zn(3)–O(22)    | 93.2(2)  |
| O(16)#1–Zn(3)–O(22)  | 87.3(2)  | O(9)–Zn(3)–N(8)#4   | 100.7(2) |
| O(16)#1–Zn(3)–N(8)#4 | 140.8(2) | O(22)–Zn(3)–N(8)#4  | 92.2(2)  |
| O(9)–Zn(3)–O(21)     | 95.0(2)  | O(16)#1–Zn(3)–O(21) | 88.9(2)  |
| O(22)–Zn(3)–O(21)    | 171.8(2) | N(8)#4–Zn(3)–O(21)  | 86.1(2)  |
| O(12)–Zn(4)–O(14)    | 92.6(2)  | O(12)–Zn(4)–N(12)#4 | 120.7(2) |
| O(14)–Zn(4)–N(12)#4  | 146.4(2) | O(12)–Zn(4)–O(23)   | 91.1(2)  |
| O(14)–Zn(4)–O(23)    | 85.2(2)  | N(12)#4–Zn(4)–O(23) | 89.4(2)  |
| O(12)–Zn(4)–O(24)    | 96.8(2)  | O(14)–Zn(4)–O(24)   | 91.0(2)  |
| N(12)#4–Zn(4)–O(24)  | 89.5(2)  | O(23)–Zn(4)–O(24)   | 171.4(2) |

---

**2**

|                     |            |                     |            |
|---------------------|------------|---------------------|------------|
| Zn(1)–O(3)#1        | 1.9968(18) | Zn(1)–O(1)          | 2.048(2)   |
| Zn(1)–N(3)#2        | 2.134(2)   | Zn(1)–N(2)#3        | 2.143(2)   |
| Zn(1)–O(5)          | 2.2252(18) | Zn(1)–O(5)#4        | 2.2890(18) |
| O(3)#1–Zn(1)–O(1)   | 171.17(8)  | O(3)#1–Zn(1)–N(3)#2 | 98.60(8)   |
| O(1)–Zn(1)–N(3)#2   | 90.08(8)   | O(3)#1–Zn(1)–N(2)#3 | 91.12(8)   |
| O(1)–Zn(1)–N(2)#3   | 88.72(8)   | N(3)#2–Zn(1)–N(2)#3 | 101.68(9)  |
| O(3)#1–Zn(1)–O(5)   | 87.75(8)   | O(1)–Zn(1)–O(5)     | 89.80(7)   |
| N(3)#2–Zn(1)–O(5)   | 95.38(7)   | N(2)#3–Zn(1)–O(5)   | 162.88(8)  |
| O(3)#1–Zn(1)–O(5)#4 | 84.37(7)   | O(1)–Zn(1)–O(5)#4   | 86.80(7)   |
| N(3)#2–Zn(1)–O(5)#4 | 169.46(7)  | N(2)#3–Zn(1)–O(5)#4 | 88.32(7)   |
| O(5)–Zn(1)–O(5)#4   | 74.57(8)   |                     |            |

---

**3**

|                   |            |                     |            |
|-------------------|------------|---------------------|------------|
| Zn(1)–O(2)        | 1.965(2)   | Zn(1)–O(3)#1        | 1.903(2)   |
| Zn(1)–O(5)        | 1.970(2)   | Zn(1)–N(3)#2        | 2.058(3)   |
| O(3)#1–Zn(1)–O(2) | 123.72(12) | O(3)#1–Zn(1)–O(5)   | 124.72(10) |
| O(2)–Zn(1)–O(5)   | 103.40(11) | O(3)#1–Zn(1)–N(3)#2 | 104.70(11) |
| O(2)–Zn(1)–N(3)#2 | 92.17(10)  | O(5)–Zn(1)–N(3)#2   | 100.22(11) |

---

**4**

|            |          |              |          |
|------------|----------|--------------|----------|
| Zn(1)–O(2) | 1.925(4) | Zn(1)–O(3)#1 | 1.974(3) |
|------------|----------|--------------|----------|

|                     |            |                     |            |
|---------------------|------------|---------------------|------------|
| Zn(1)–N(2)#2        | 2.024(4)   | Zn(1)–O(1)#3        | 2.163(4)   |
| Zn(1)–O(5)          | 2.332(4)   | O(2)–Zn(1)–O(3)#1   | 142.03(16) |
| O(2)–Zn(1)–N(2)#2   | 116.96(17) | O(3)#1–Zn(1)–N(2)#2 | 99.69(16)  |
| O(2)–Zn(1)–O(1)#3   | 94.36(16)  | O(3)#1–Zn(1)–O(1)#3 | 93.53(15)  |
| N(2)#2–Zn(1)–O(1)#3 | 92.52(15)  | O(2)–Zn(1)–O(5)     | 89.91(15)  |
| O(3)#1–Zn(1)–O(5)   | 81.39(15)  | N(2)#2–Zn(1)–O(5)   | 88.00(15)  |
| O(1)#3–Zn(1)–O(5)   | 174.91(14) |                     |            |

---

5

---

|                    |           |                      |           |
|--------------------|-----------|----------------------|-----------|
| Zn(1)–O(34)        | 1.931(11) | Zn(1)–O(9)           | 1.962(12) |
| Zn(1)–O(17)#1      | 2.007(12) | Zn(1)–N(8)#2         | 2.029(14) |
| Zn(2)–O(19)#3      | 1.964(12) | Zn(2)–O(37)          | 2.000(10) |
| Zn(2)–N(15)        | 2.038(14) | Zn(2)–O(27)#4        | 2.119(12) |
| Zn(2)–O(28)#4      | 2.345(14) | Zn(3)–O(3)           | 1.947(11) |
| Zn(3)–O(33)        | 1.922(11) | Zn(3)–N(3)#3         | 2.032(13) |
| Zn(3)–O(11)        | 1.996(11) | Zn(4)–N(24)#2        | 2.015(14) |
| Zn(4)–O(24)        | 2.011(13) | Zn(5)–O(15)#3        | 1.979(12) |
| Zn(5)–O(34)#5      | 1.943(11) | Zn(5)–N(12)          | 2.067(14) |
| Zn(5)–O(7)#6       | 2.040(13) | Zn(6)–N(20)          | 2.031(14) |
| Zn(6)–O(38)        | 1.995(10) | Zn(6)–O(25)#2        | 1.954(11) |
| Zn(6)–O(1)#5       | 2.050(12) | Zn(7)–O(5)           | 1.961(12) |
| Zn(7)–O(33)        | 1.942(11) | Zn(7)–N(5)#2         | 2.037(14) |
| Zn(7)–O(29)#7      | 2.031(12) | Zn(8)–O(14)          | 2.014(13) |
| Zn(8)–O(37)        | 2.006(10) | Zn(8)–N(17)          | 2.035(13) |
| Zn(8)–O(21)#2      | 2.019(11) | Zn(9)–O(36)          | 2.039(11) |
| Zn(9)–O(22)#2      | 2.001(11) | Zn(9)–O(35)          | 2.150(12) |
| Zn(9)–O(12)        | 2.096(11) | Zn(9)–O(13)          | 2.210(14) |
| Zn(9)–O(37)        | 2.161(11) | Zn(10)–O(39)         | 2.041(11) |
| Zn(10)–O(32)       | 2.006(10) | Zn(10)–O(18)#7       | 2.146(13) |
| Zn(10)–O(40)       | 2.132(14) | Zn(10)–O(38)         | 2.178(11) |
| Zn(10)–O(23)       | 2.148(13) |                      |           |
| O(34)–Zn(1)–O(9)   | 117.0(5)  | O(34)–Zn(1)–O(17)#1  | 109.1(5)  |
| O(9)–Zn(1)–O(17)#1 | 103.0(5)  | O(34)–Zn(1)–N(8)#2   | 110.7(6)  |
| O(9)–Zn(1)–N(8)#2  | 100.1(6)  | O(17)#1–Zn(1)–N(8)#2 | 116.8(6)  |

|                       |          |                       |          |
|-----------------------|----------|-----------------------|----------|
| O(19)#3–Zn(2)–O(37)   | 112.6(5) | O(19)#3–Zn(2)–N(15)   | 100.8(6) |
| O(37)–Zn(2)–N(15)     | 107.5(5) | O(19)#3–Zn(2)–O(27)#4 | 99.3(5)  |
| O(37)–Zn(2)–O(27)#4   | 99.4(5)  | N(15)–Zn(2)–O(27)#4   | 136.7(5) |
| O(19)#3–Zn(2)–O(28)#4 | 141.6(5) | O(37)–Zn(2)–O(28)#4   | 102.0(5) |
| N(15)–Zn(2)–O(28)#4   | 83.5(5)  | O(27)#4–Zn(2)–O(28)#4 | 57.7(5)  |
| O(33)–Zn(3)–O(3)      | 116.0(5) | O(33)–Zn(3)–O(11)     | 108.5(5) |
| O(3)–Zn(3)–O(11)      | 104.6(5) | O(33)–Zn(3)–N(3)#3    | 112.9(5) |
| O(3)–Zn(3)–N(3)#3     | 99.8(5)  | O(11)–Zn(3)–N(3)#3    | 114.8(5) |
| O(31)–Zn(4)–O(38)     | 106.6(5) | O(31)–Zn(4)–O(24)     | 122.7(6) |
| O(38)–Zn(4)–O(24)     | 105.9(5) | O(31)–Zn(4)–N(24)#2   | 101.9(5) |
| O(38)–Zn(4)–N(24)#2   | 129.1(6) | O(24)–Zn(4)–N(24)#2   | 92.2(5)  |
| O(34)#5–Zn(5)–O(15)#3 | 111.9(5) | O(34)#5–Zn(5)–O(7)#6  | 102.0(5) |
| O(15)#3–Zn(5)–O(7)#6  | 100.2(5) | O(34)#5–Zn(5)–N(12)   | 119.8(5) |
| O(15)#3–Zn(5)–N(12)   | 99.3(5)  | O(7)#6–Zn(5)–N(12)    | 122.0(5) |
| O(25)#2–Zn(6)–O(38)   | 113.3(5) | O(25)#2–Zn(6)–N(20)   | 99.7(5)  |
| O(38)–Zn(6)–N(20)     | 107.3(5) | O(25)#2–Zn(6)–O(1)#5  | 104.5(5) |
| O(38)–Zn(6)–O(1)#5    | 102.4(5) | N(20)–Zn(6)–O(1)#5    | 129.9(5) |
| O(33)–Zn(7)–O(5)      | 118.2(5) | O(33)–Zn(7)–O(29)#7   | 101.7(5) |
| O(5)–Zn(7)–O(29)#7    | 102.9(5) | O(33)–Zn(7)–N(5)#2    | 113.0(6) |
| O(5)–Zn(7)–N(5)#2     | 98.6(5)  | O(29)#7–Zn(7)–N(5)#2  | 123.2(5) |
| O(37)–Zn(8)–O(14)     | 103.8(5) | O(37)–Zn(8)–O(21)#2   | 101.6(4) |
| O(14)–Zn(8)–O(21)#2   | 126.5(6) | O(37)–Zn(8)–N(17)     | 138.5(6) |
| O(14)–Zn(8)–N(17)     | 90.5(6)  | O(21)#2–Zn(8)–N(17)   | 100.4(5) |
| O(22)#2–Zn(9)–O(36)   | 173.0(5) | O(22)#2–Zn(9)–O(12)   | 91.6(5)  |
| O(36)–Zn(9)–O(12)     | 93.1(5)  | O(22)#2–Zn(9)–O(35)   | 86.6(5)  |
| O(36)–Zn(9)–O(35)     | 88.6(5)  | O(12)–Zn(9)–O(35)     | 85.8(5)  |
| O(22)#2–Zn(9)–O(37)   | 87.8(4)  | O(36)–Zn(9)–O(37)     | 88.8(4)  |
| O(12)–Zn(9)–O(37)     | 167.4(4) | O(35)–Zn(9)–O(37)     | 106.7(4) |
| O(22)#2–Zn(9)–O(13)   | 99.1(5)  | O(36)–Zn(9)–O(13)     | 86.4(5)  |
| O(12)–Zn(9)–O(13)     | 85.9(5)  | O(35)–Zn(9)–O(13)     | 170.0(6) |
| O(37)–Zn(9)–O(13)     | 81.8(5)  | O(32)–Zn(10)–O(39)    | 170.8(5) |
| O(32)–Zn(10)–O(40)    | 88.8(5)  | O(39)–Zn(10)–O(40)    | 88.0(5)  |
| O(32)–Zn(10)–O(18)#7  | 92.9(4)  | O(39)–Zn(10)–O(18)#7  | 95.3(5)  |

|                      |          |                    |          |
|----------------------|----------|--------------------|----------|
| O(40)–Zn(10)–O(18)#7 | 83.5(5)  | O(32)–Zn(10)–O(23) | 98.1(5)  |
| O(39)–Zn(10)–O(23)   | 86.9(5)  | O(40)–Zn(10)–O(23) | 166.2(6) |
| O(18)#7–Zn(10)–O(23) | 84.3(5)  | O(32)–Zn(10)–O(38) | 85.4(4)  |
| O(39)–Zn(10)–O(38)   | 87.5(5)  | O(40)–Zn(10)–O(38) | 108.9(5) |
| O(18)#7–Zn(10)–O(38) | 167.5(4) | O(23)–Zn(10)–O(38) | 83.7(4)  |

<sup>a</sup> Symmetry transformations used to generate equivalent atoms: #1  $x + 1, y, z - 1$ ; #2  $x, y, z - 1$ ; #3  $x - 1, y, z$ ; #4  $x + 1, y, z$  for **1**; #1  $x + 1/2, y - 1/2, z$ ; #2  $x, -y + 2, z - 1/2$ ; #3  $-x + 2, y, -z + 3/2$ ; #4  $-x + 2, -y + 1, -z + 1$  for **2**; #1  $-x + 1, y - 1/2, -z + 5/2$ ; #2  $-x + 1, y - 1/2, -z + 3/2$  for **3**; #1  $x - 1/2, -y + 3/2, z + 1/2$ ; #2  $x - 1, -y + 1, z - 1/2$ ; #3  $x, -y + 1, z + 1/2$  for **4**; #1  $-x - 1, -y + 1, -z + 2$ ; #2  $x - 1, y, z$ ; #3  $x + 1, y, z$ ; #4  $x - 1, y, z - 1$ ; #5  $-x, -y + 2, -z + 2$ ; #6  $-x + 1, -y + 2, -z + 1$ ; #7  $-x + 1, -y + 1, -z + 2$  for **5**.

**Table S2.** Hydrogen bonding data for compounds **1** and **3**.<sup>a</sup>

| D–H...A                | d(D...A) (Å) | ∠D–H...A (°) |
|------------------------|--------------|--------------|
| <b>1</b>               |              |              |
| O(17)–H(17A)...O(8)#1  | 2.686(8)     | 168          |
| O(18)–H(18B)...O(16)#2 | 2.644(8)     | 134          |
| O(19)–H(19B)...O(5)#3  | 2.732(8)     | 167          |
| O(20)–H(20A)...O(14)   | 3.140(7)     | 146          |
| O(20)–H(20B)...O(12)   | 2.963(8)     | 138          |
| O(21)–H(21A)...O(8)#2  | 2.952(8)     | 146          |
| O(22)–H(22A)...O(10)#4 | 2.751(8)     | 159          |
| O(23)–H(23A)...O(6)    | 2.924(8)     | 176          |
| O(23)–H(23B)...O(26)#5 | 2.696(9)     | 144          |
| O(24)–H(24A)...N(9)#6  | 3.090(9)     | 167          |
| O(24)–H(24B)...O(11)#7 | 2.696(7)     | 156          |
| <b>3</b>               |              |              |
| O(5)–H(5A)...N(2)#1    | 2.805(4)     | 178          |
| O(5)–H(5B)...O(4)#2    | 2.648(3)     | 178          |

<sup>a</sup> Symmetry transformations used to generate equivalent atoms: #1  $-x + 1, -y + 1, -z + 2$ ; #2  $x + 1, y, z - 1$ ; #3  $-x, -y + 1, -z + 2$ ; #4  $-x + 1, -y + 2, -z + 1$ ; #5  $x, y, z + 1$ ; #6  $-x, -y + 2, -z + 2$ ; #7  $-x + 1, -y + 2, -z + 2$  for **1**; #1  $x + 1, y, z + 1$ ; #2  $-x + 1, -y + 2, -z + 2$  for **3**.

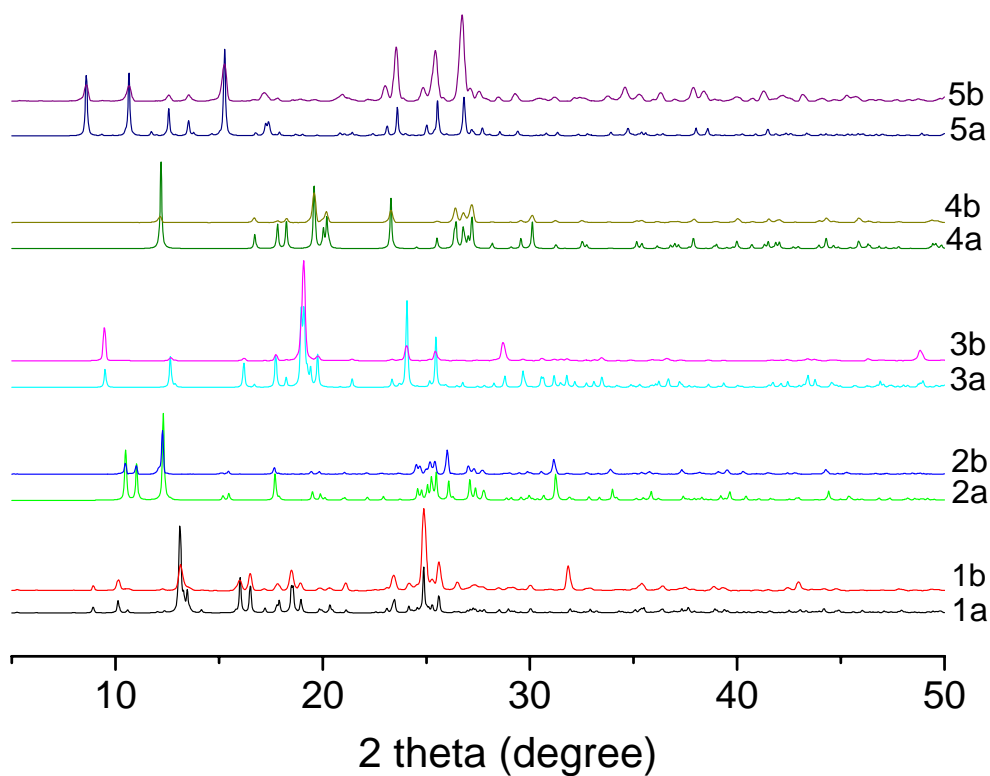

**Fig. S1.** The PXRD patterns of **1 - 5**: a – simulated; b – as-synthesized.

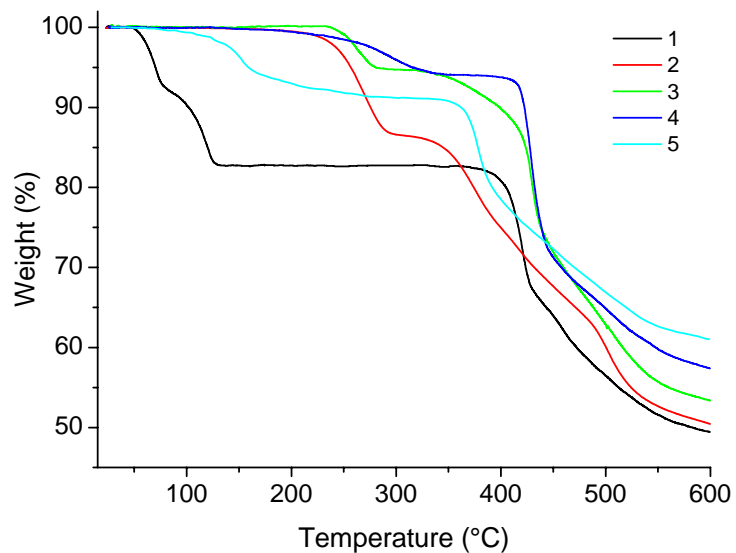

**Fig. S2.** The TGA curves of **1 - 5**.

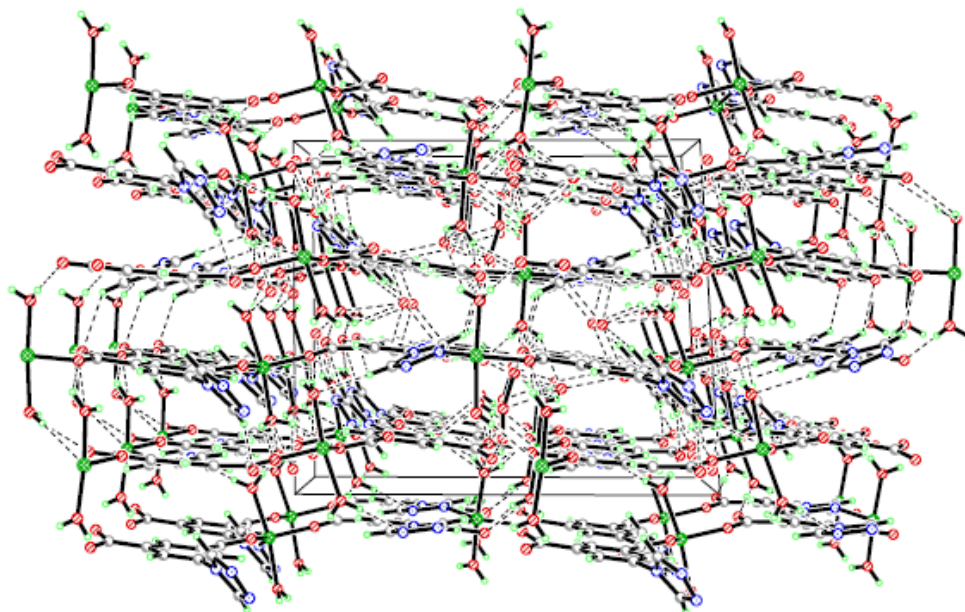

**Fig. S3.** 3D structure of **1** with hydrogen bonds indicated by dashed lines.



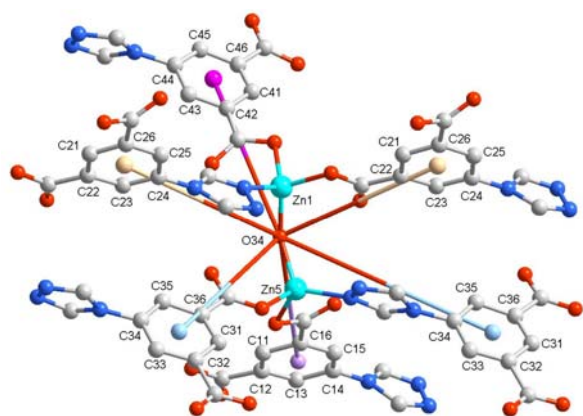

(i)

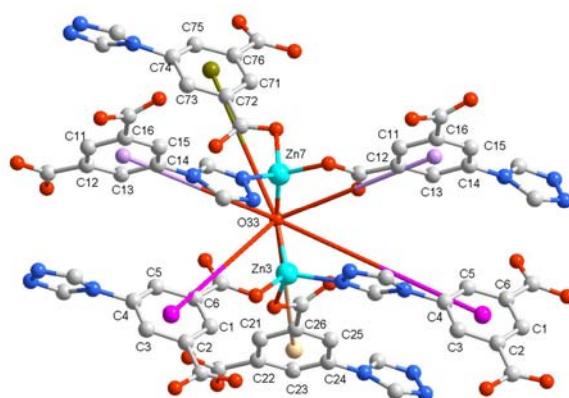

(ii)

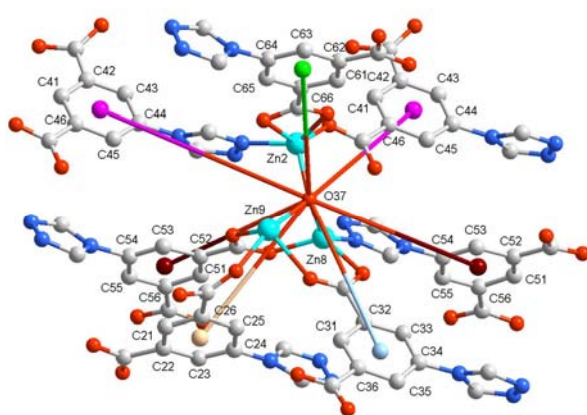

(iii)

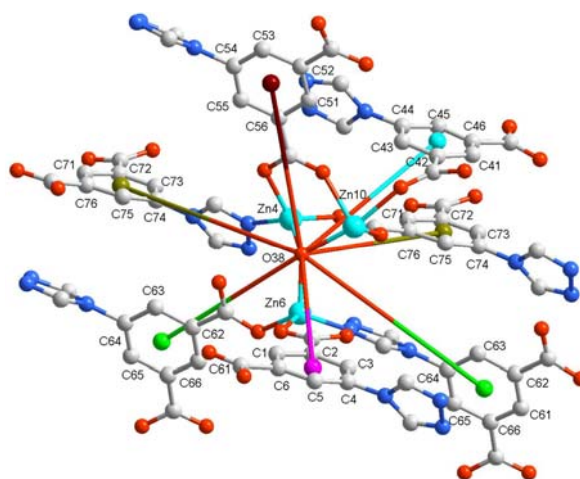

(iv)

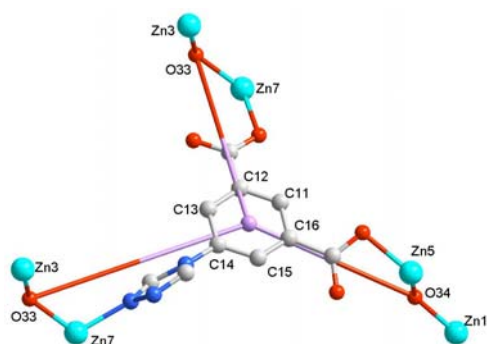

(v)

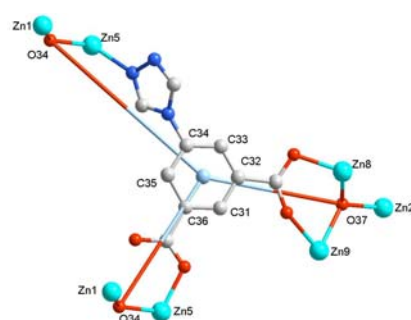

(vi)

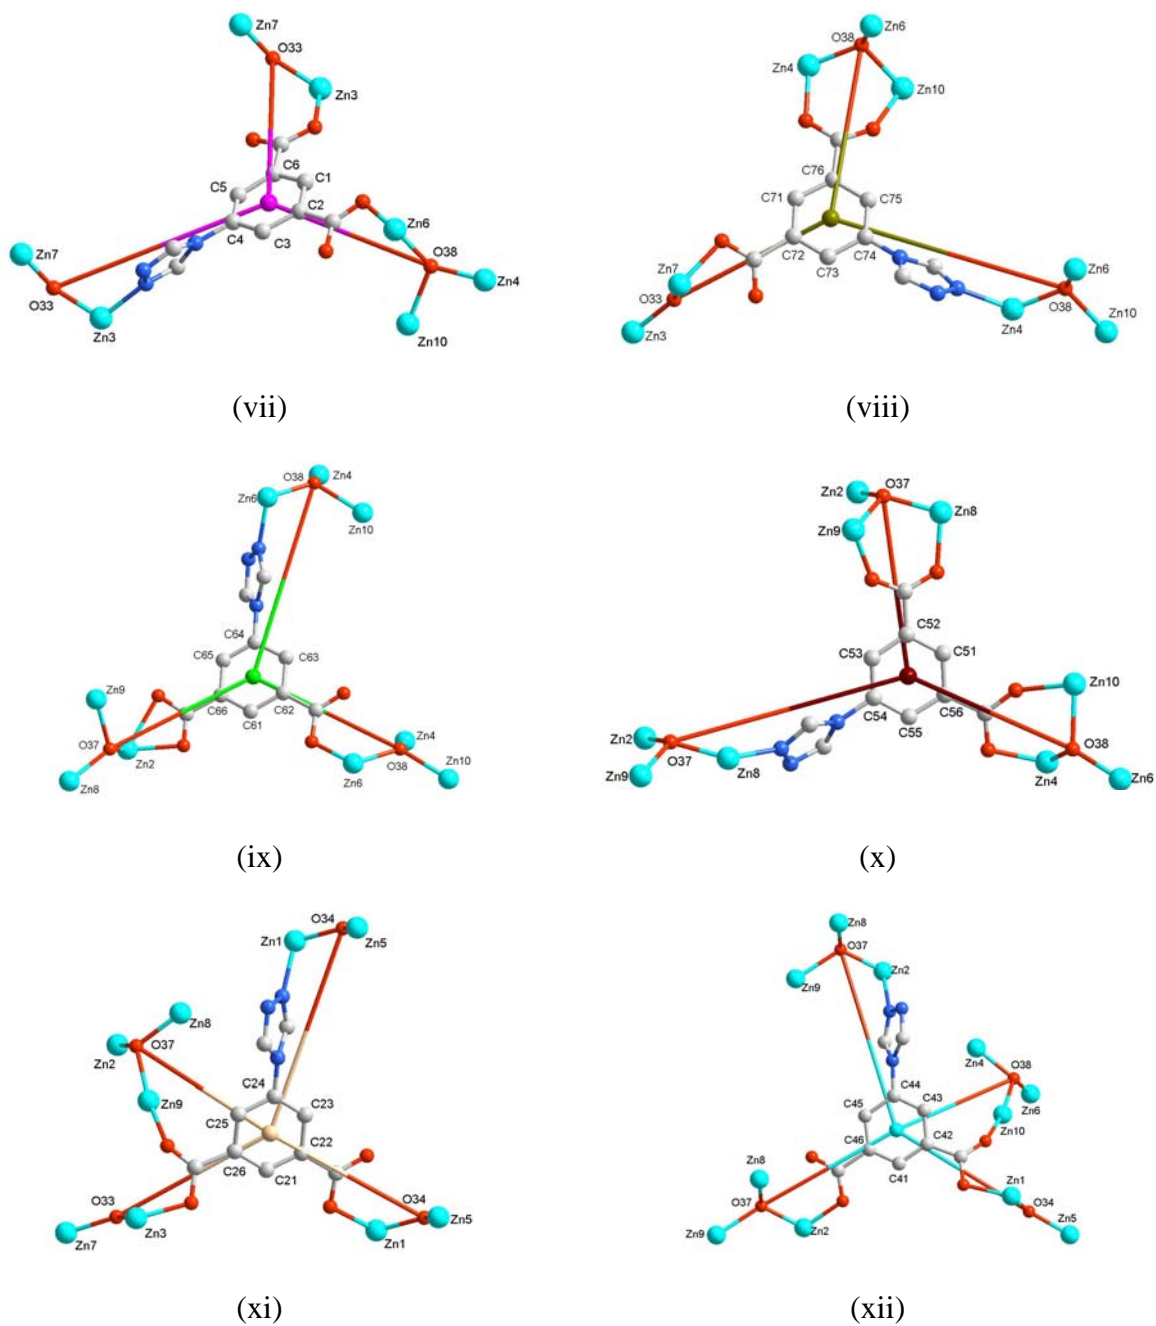

**Fig. S4.** The twelve types of nodes in **5**: (i) and (ii): 6-connected nodes of Zn1–Zn5 and Zn3–Zn7 units; (iii) and (iv): 7-connected nodes of Zn2–Zn8–Zn9 and Zn4–Zn6–Zn10 units; (v - x): 3-connected nodes of  $L^{2-}$  ligands; (xi) and (xii): 4-connected nodes of  $L^{2-}$  ligands.
